# Supplementary material for: Estimating and abstracting the 3D structure of feline bones using neural networks on X-ray (2D) images
Source: PubMed Central journal article supplement (PMC7326932; doi:10.1038/s42003-020-1057-3), 2020-06-30
Supplement: 42003_2020_1057_MOESM5_ESM.pdf [file 42003_2020_1057_MOESM5_ESM.pdf]

## Description of Additional Supplementary Files

**File Name:** Supplementary Data 1

**Description:** Training and validation dataset for “Supplementary Software 1.zip”

**File Name :** Supplementary Data 2

**Description:** Embeddings of the images of the 24 bones, as generated by the fully trained Triplet network. Underlying data for the plots in Figure 5.

**File Name:** Supplementary Software 1

**Description:** Custom software to pre-process data, train neural networks and classifiers, and to classify images.

**File Name:** Supplementary Software 2

**Description:** Pre-trained Triplet neural network and kNN classifier. These files are created as the result of the training process when using the scripts in “Supplementary Software 1.zip”.
